# Supplementary material for: Idiopathic Bilateral Brachymetacarpia–Brachymetatarsia with Third Metacarpal and Fourth Metatarsal Involvement- Case Report
Source: Research Square preprint supplement (doi:10.21203/rs.3.rs-7871221/v1), 2025-11-19
Supplement: Supplementary file 1 [file 4c5e04ef86683b5c1a2c8c30.docx]

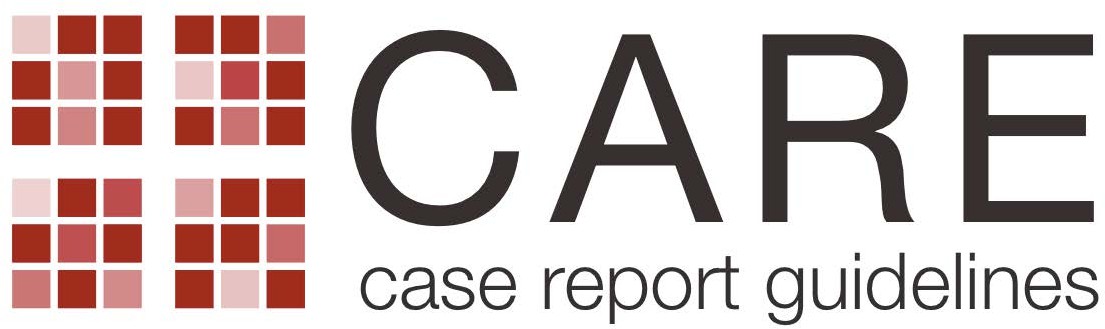
CARE Checklist of information to include when writing a case report
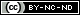


**Topic Item Checklist item description Reported on Line**

**Title 1** The diagnosis or intervention of primary focus followed by the words “case report”…………………………….. **26-27**

**Key Words 2** 2 to 5 key words that identify diagnoses or interventions in this case report, including "case report".**48-49**

**Abstract**

**(no references)**

**3a** Introduction: What is unique about this case and what does it add to the scientific literature?....................**46-47**

**3b** Main symptoms and/or important clinical findings ………………………………………………………………. **42-45**

**3c** The main diagnoses, therapeutic interventions, and outcomes ………………………………………………..**42-45**

**3d** Conclusion—What is the main “take-away” lesson(s) from this case? ……………………………………….**46-47**

**Introduction 4** One or two paragraphs summarizing why this case is unique (**may include** reference**s**)………..**50-78**

**Patient Information 5a** De-identified patient specific information…………………………………………………………….…..**81-82**

**5b** Primary concerns and symptoms of the patient………………………………………………………....**82-84**

**5c** Medical, family, and psycho-social history including relevant genetic information…………………..**85-86**

**5d** Relevant past interventions with outcomes…………………………………………………………………**84-85**

**Clinical Findings**

**Timeline**

**Diagnostic Assessment**

**Therapeutic Intervention**

**Follow-up and Outcomes**

1. Describe significant physical examination (PE) and important clinical findings………………….…..**87-103**
2. Historical and current information from this episode of care organized as a timeline………………. **99-103**

**8a** Diagnostic testing (such as PE, laboratory testing, imaging, surveys)……………………………… **81-139**

**8b** Diagnostic challenges (such as access to testing, financial, or cultural)…………………………….**93-198**

**8c** Diagnosis (including other diagnoses considered)………………………………………………………**144-158**

**8d** Prognosis (such as staging in oncology) where applicable…………………………………………….**165-173**

**9a** Types of therapeutic intervention (such as pharmacologic, surgical, preventive, self-care) ……………….. **99-100**

**9b** Administration of therapeutic intervention (such as dosage, strength, duration) N/A

**9c** Changes in therapeutic intervention (with rationale) N/A

**10a** Clinician and patient-assessed outcomes (if available) N/A

**10b** Important follow-up diagnostic and other test results N/A

**10c** Intervention adherence and tolerability (How was this assessed?) N/A

**10d** Adverse and unanticipated events N/A

**Discussion 11a** A scientific discussion of the strengths AND limitations associated with this case report…………………………**143-198**

**11b** Discussion of the relevant medical literature **with references**…………………………………………………….**143-191**

**11c** The scientific rationale for any conclusions (including assessment of possible causes)………………………….**143-191**

**11d** The primary “take-away” lessons of this case report (without references) in a one paragraph conclusion………**200-208**

**Patient Perspective 12** The patient should share their perspective in one to two paragraphs on the treatment(s) they received ……….**99-104**

**Informed Consent 13** Did the patient give informed consent? Please provide if requested……………………………………………**216-218 Yes
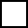
** **No
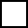
**
